# Supplementary material for: Application of a New Method for GWAS in a Related Case/Control Sample with Known Pedigree Structure: Identification of New Loci for Nephrolithiasis
Source: PLOS journal article supplement (doi:10.1371/journal.pgen.1001281), 2011-01-20
Supplement: S8 (10.1371/journal.pgen.1001281.s008) [file journal.pgen.1001281.s008]

**Table S5:** Results obtained with ROADTRIPS for the whole Talana sample in the replication study for the 96 SNPs. Only SNPs with a p-value<0.05 are shown. Bold SNPs were analyzed in the initial GWAS.

| **CH** | **SNP** | **position** | **location** | **GENE** | **alleles** | **ref** | **MAF**  **cases** | **MAF**  **controls** | ***RM*** | ***R*** |
| --- | --- | --- | --- | --- | --- | --- | --- | --- | --- | --- |
| 1 | **rs12404212** | 244348886 | intron | *SMYD3* | A,G | A | 0.206 | 0.161 | 0.00638 | NS |
| 2 | **rs11125301** | 50452354 | intron | *NRXN1* | T,A | T | 0.301 | 0.473 | 0.00020 | 0.00040 |
| 2 | **rs1864466** | 203564702 | flanking_3UTR | *ALS2CR8* | A,G | A | 0.288 | 0.145 | 0.00125 | 0.00040 |
| 2 | **rs16838282** | 207036840 | intron | *ADAM23* | G,A | G | 0.295 | 0.161 | 0.00024 | 0.00118 |
| 2 | **rs11891267** | 207063312 | intron | *ADAM23* | A,G | A | 0.295 | 0.161 | 0.00024 | 0.00118 |
| 2 | rs1025077 | 207082073 | intron | *ADAM23* | A,G | A | 0.514 | 0.398 | 0.00504 | 0.01884 |
| 2 | rs3755224 | 207110679 | intron | *ADAM23* | G,A | G | 0.301 | 0.161 | 0.00037 | 0.00069 |
| 2 | rs16838320 | 207119150 | intron | *ADAM23* | G,A | G | 0.021 | 0.016 | 0.01641 | NS |
| 2 | rs6722977 | 207221028 | intron | *ADAM23* | A,G | A | 0.021 | 0.016 | 0.01641 | NS |
| 2 | rs6704787 | 207263993 | intron | *DYTN* | G,A | G | 0.014 | 0.022 | 0.03052 | NS |
| 2 | **rs2359681** | 207274185 | intron | *DYTN* | A,G | A | 0.301 | 0.183 | 0.00349 | 0.00480 |
| 2 | **rs16838613** | 207274993 | intron | *DYTN* | C,A | C | 0.473 | 0.344 | 0.00905 | 0.00818 |
| 2 | rs2163033 | 207275367 | intron | *DYTN* | A,T | A | 0.473 | 0.344 | 0.00905 | 0.00818 |
| 2 | **rs16838630** | 207278048 | intron | *DYTN* | C,A | C | 0.473 | 0.344 | 0.00905 | 0.00818 |
| 6 | **rs10946741** | 25118978 | flanking_5UTR | *LRRC16A* | A,G | A | 0.264 | 0.371 | 0.00001 | 0.02160 |
| 6 | rs1002539 | 25199319 | flanking_5UTR | *LRRC16A* | G,A | G | 0.281 | 0.350 | 0.03601 | NS |
| 6 | rs3818270 | 25200518 | flanking_5UTR | *LRRC16A* | C,A | C | 0.480 | 0.462 | 0.04910 | NS |
| 6 | rs9461102 | 25205277 | flanking_5UTR | *LRRC16A* | G,C | G | 0.007 | 0.048 | 0.07649 | 0.01426 |
| 6 | rs880226 | 25510282 | intron | *LRRC16A* | A,G | A | 0.219 | 0.333 | 0.00164 | 0.01062 |
| 6 | **rs12173289** | 25515757 | intron | *LRRC16A* | G,A | G | 0.569 | 0.430 | 1.2E-06 | 0.00525 |
| 6 | **rs6912426** | 25517764 | intron | *LRRC16A* | G,A | G | 0.404 | 0.527 | 0.00001 | 0.01315 |
| 6 | **rs990850** | 25736490 | flanking_3UTR | *LRRC16A* | A,G | A | 0.219 | 0.167 | 0.00137 | NS |
| 6 | **rs2328894** | 25886161 | coding | *SLC17A4* | A,G | A | 0.226 | 0.140 | 0.00136 | 0.02291 |
| 6 | rs1892253 | 25890293 | flanking_3UTR | *SLC17A4-1* | A,C | A | 0.014 | 0.038 | 0.04145 | NS |
| 6 | rs1165208 | 25911883 | intron | *SLC17A4-1* | A,G | A | 0.473 | 0.355 | NS | 0.01563 |
| 7 | **rs16872208** | 7957012 | flanking_5UTR | *GLCCI1* | T,A | T | 0.288 | 0.188 | 0.02046 | 0.01745 |
| 7 | **rs17528240** | 10716439 | flanking_3UTR | *NDUFA4, PHF14* | G,A | G | 0.555 | 0.371 | 0.00031 | 0.00020 |
| 8 | **rs1484190** | 2879144 | intron | *CSMD1* | T,A | T | 0.569 | 0.409 | 0.00238 | 0.00125 |
| 8 | **rs12707927** | 129274206 | flanking_5UTR | *PVT1* | A,G | A | 0.144 | 0.048 | 0.00020 | 0.00079 |
| 10 | **rs11239832** | 42739373 | flanking_3UTR | *BMS1* | A,C | A | 0.226 | 0.086 | 0.00931 | 0.00007 |
| 10 | **rs6480454** | 71778181 | intron | *LRRC20* | A,G | A | 0.164 | 0.145 | 0.00323 | NS |
| 10 | **rs7894520** | 72066837 | flanking_5UTR | *ADAMTS14* | A,G | A | 0.321 | 0.270 | 0.04555 | NS |
| 10 | rs826460 | 72075768 | flanking_5UTR | *ADAMTS14* | A,G | A | 0.329 | 0.425 | 0.04966 | 0.04647 |
| 10 | rs12771779 | 72082782 | flanking_5UTR | *ADAMTS14* | A,G | A | 0.315 | 0.263 | 0.02927 | NS |
| 10 | **rs12784847** | 72181534 | intron | *ADAMTS14* | A,G | A | 0.425 | 0.339 | 0.00759 | NS |
| 10 | rs10823612 | 72187531 | intron | *ADAMTS14* | A,G | A | 0.452 | 0.382 | 0.00823 | NS |
| 10 | **rs3740434** | 72192195 | flanking_3UTR | *ADAMTS14* | A,G | A | 0.445 | 0.366 | 0.00671 | NS |
| 10 | **rs11591930** | 72198570 | flanking_3UTR | *ADAMTS14* | T,A | T | 0.445 | 0.360 | 0.00374 | NS |
| 10 | rs9732438 | 72663187 | flanking_5UTR | *UNC5B* | C,A | C | 0.493 | 0.419 | 0.04878 | NS |
| 10 | rs879277 | 72672097 | flanking_5UTR | *UNC5B* | G,A | G | 0.459 | 0.527 | 0.01250 | NS |
| 10 | rs6480502 | 72677221 | flanking_5UTR | *UNC5B* | T,A | T | 0.404 | 0.468 | 0.04545 | NS |
| 10 | **rs7915759** | 72680328 | flanking_5UTR | *UNC5B* | A,C | A | 0.370 | 0.452 | 0.03278 | NS |
| 10 | rs12266036 | 72681165 | flanking_5UTR | *UNC5B* | A,G | A | 0.500 | 0.419 | 0.01886 | NS |
| 10 | **rs17545289** | 72685069 | flanking_5UTR | *UNC5B* | A,G | A | 0.500 | 0.425 | 0.02067 | NS |
| 10 | rs2394784 | 72689765 | flanking_5UTR | *UNC5B* | A,G | A | 0.322 | 0.403 | 0.02785 | NS |
| 12 | **rs764377** | 126947603 | flanking_5UTR | *LOC644489* | A,G | A | 0.185 | 0.065 | 0.00110 | 0.00016 |
| 22 | **rs12167903** | 29096466 | coding | *CCDC157* | A,G | A | 0.123 | 0.059 | 0.00402 | 0.02197 |
